# Supplementary material for: JmjC-domain-containing proteins and histone demethylation
Source: Springer Nature journal article supplement (doi:10.1038/nrg1945), 2006-08-18
Supplement: 41576_2006_BFnrg1945_MOESM1_ESM.pdf [file 41576_2006_BFnrg1945_MOESM1_ESM.pdf]

Supplementary information S1 | Annotation of JmjC-domain-containing proteins from humans, mice, flies, worms, and yeast.

| Organism | Name        | AlternateNames                                                        |
|----------|-------------|-----------------------------------------------------------------------|
| Pombe    | Spac25h1    | Spac25h1.02, Jmj1                                                     |
| Pombe    | Epe1        | SPCC622.16c                                                           |
| Pombe    | Spcc622     | Jmj4                                                                  |
| Pombe    | Ecm5        | SPBC83.07, Lid2, jmj3                                                 |
| Pombe    | Spbp4h10.01 | SPBP19A11.06, lid2                                                    |
| Pombe    | SPAC1002    | Jmj2                                                                  |
| Pombe    | Q9UT79      | SPAC343.11c, msc1                                                     |
| Human    | NO66        | C14orf169, FLJ21802                                                   |
| Human    | JHDM1B      | FBXL10, CXXC2, Fbl10, PCCX2, JEMMA                                    |
| Human    | JHDM1A      | FBXL11, CXXC8, DKFZP434M1735, FBL11, FBL7, FLJ00115, KIAA1004, LILIN  |
| Human    | JMJD5       | FLJ13798, LOC79831                                                    |
| Human    | FIH         | HIF1AN, DKFZp762F1811, FIH1, FLJ20615, FLJ22027                       |
| Human    | HR          | ALUNC, AU, HSA277165                                                  |
| Human    | HSPBAP1     | FLJ22623, FLJ39386, PASS1                                             |
| Human    | JARID1A     | RBBP2, RBP2                                                           |
| Human    | JARID1B     | 2010009J12Rik, 2210016I17Rik, AW556288, D1Ert202e, KIAA4034, PLU-1, P |
| Human    | JARID1C     | Smcx, KIAA0234                                                        |
| Human    | JARID1D     | Smcy                                                                  |
| Human    | JARID2      | Jumonji, AI317256, AU045941, C79929, C79931, Jmj                      |
| Human    | JHDM2A      | JMJD1A, DKFZp686A24246, DKFZp686P07111, JMJD1, KIAA0742, TSGA         |
| Human    | JHDM2B      | JMJD1B, 5qNCA, C5orf7, KIAA1082                                       |
| Human    | JHDM2C      | JMJD1C, DKFZp761F0118, FLJ14374, KIAA1380, RP11-10C13.2, TRIP8        |
| Human    | JHDM3A      | JMJD2A, JMJD2, KIAA0677                                               |
| Human    | JHDM3B      | JMJD2B, KIAA0876                                                      |
| Human    | JHDM3C      | JMJD2C, GASC1, KIAA0780, bA146B14.1                                   |
| Human    | JHDM3D      | JMJD2D, FLJ10251                                                      |
| Human    | JMJD3       | RP23-5O23.5, 1700064E03Rik, BC038313, KIAA0346, mKIAA0346             |
| Human    | JMJD4       | RP23-210M6.10, 6430559I23, AU020939                                   |
| Human    | KIAA1718    |                                                                       |
| Human    | LOC339123   | PP14397                                                               |
| Human    | MINA53      | DKFZp762O1912, FLJ14393, MDIG, MINA, NO52                             |
| Human    | PHF2        | GRC5, KIAA0662                                                        |
| Human    | PHF8        | RP13-444K19.2, DKFZp686E0868, KIAA1111, ZNF422                        |
| Human    | PLA2G4B     | HsT16992, cPLA2-beta                                                  |
| Human    | PTDSR       | PSR, KIAA0585, PTDSR1                                                 |
| Human    | UTX         | RP13-886N14.3, DKFZp686A03225, bA386N14.2                             |
| Human    | UTY         | UTY1                                                                  |
| Worm     | rbr-2       | ZK593.4                                                               |
| Worm     | XJ181       | D2021.1                                                               |
| Worm     | 5L609       | C06H2.3                                                               |
| Worm     | 4F419       | psr-1, F29B9.4, tag-159                                               |
| Worm     | 2O526       | Y48B6A.11                                                             |
| Worm     | XO59        | C29F7.6                                                               |
| Worm     | XP71        | F23D12.5                                                              |
| Worm     | CE20788     | F43G6.6, 2M97, spt-3                                                  |
| Worm     | 3H549       | T26A5.5                                                               |
| Worm     | XJ193       | tag-279, F18E9.5                                                      |
| Worm     | 4F429       | F29B9.2                                                               |
| Worm     | 1E200       | T28F2.4                                                               |
| Worm     | 3g50        | C27F2.5                                                               |
| Fly      | CG13902     |                                                                       |

|            |               |                                                                         |
|------------|---------------|-------------------------------------------------------------------------|
| Fly        | CG15835       |                                                                         |
| Fly        | CG33182       | CG4037                                                                  |
| Fly        | CG5383        | L0022859, PS, dPSR, PSR                                                 |
| Fly        | CG8165        | CG31123                                                                 |
| Fly        | CG5640        |                                                                         |
| Fly        | Lid           | CG9088, lid, l(2)10424                                                  |
| Fly        | CG2982        |                                                                         |
| Fly        | CG12879       |                                                                         |
| Fly        | CG11033       |                                                                         |
| Fly        | CG7200        |                                                                         |
| Fly        | CG3654        |                                                                         |
| Fly        | CG10133       |                                                                         |
| Cerevisiae | Jhd1          | YER051W                                                                 |
| Cerevisiae | Rph1          | YER169W                                                                 |
| Cerevisiae | Yjr119c       |                                                                         |
| Cerevisiae | Ecm5          | YMR176W                                                                 |
| Cerevisiae | Gis1          | YDR096W                                                                 |
| Mouse      | No66          | 2410016O06Rik                                                           |
| Mouse      | 2610003J06Rik |                                                                         |
| Mouse      | Jmjd5         | LOC77035, 3110005O21Rik                                                 |
| Mouse      | Jmjd2d        | Jmjd2d, 4932416A15                                                      |
| Mouse      | Kiaa1718      | BB041802, A630082K20Rik                                                 |
| Mouse      | Jhdm1b        | Fbxl10, Cxxc2, E430001G17, Fbl10, KIAA3014, PCCX2, mKIAA3014            |
| Mouse      | Jhdm1a        | Fbxl11, Cxxc8, Fbl11, Fbl7, lalina                                      |
| Mouse      | Fih           | Hif1an,2310046M24Rik, A830014H24Rik, FIH1                               |
| Mouse      | Hr            | ALUNC, AU, N, ba, rh, rh-bmh, rhino                                     |
| Mouse      | Hspbap1       | 3830421G21Rik                                                           |
| Mouse      | Jarid1a       | RBBP2, RBP2                                                             |
| Mouse      | Jarid1b       | 2010009J12Rik, 2210016I17Rik, AW556288, D1Erttd202e, KIAA4034, PLU-1, P |
| Mouse      | Jarid1c       | Smcx, mKIAA0234                                                         |
| Mouse      | Jarid1d       | Smcy                                                                    |
| Mouse      | Jarid2        | AI317256, AU045941, C79929, C79931, Jmj                                 |
| Mouse      | Jhdm2a        | Jmjd1a, 1700105C21Rik, C230043E16Rik, Jmjd1, TGSA, Tsga, mKIAA0742      |
| Mouse      | Jhdm2b        | Jmjd1b, 5830462I21Rik, mKIAA1082                                        |
| Mouse      | Jhdm2c        | Jmjd1c, 5430433L24Rik, D630035I23Rik, Jmjdic, TRIP8                     |
| Mouse      | Jhdm3a        | Jmjd2a, JMJD2, KIAA0677                                                 |
| Mouse      | Jhdm3b        | Jmjd2b, KIAA0876                                                        |
| Mouse      | Jhdm3c        | Jmjd2c, GASC1, KIAA0780, bA146B14.1                                     |
| Mouse      | Jhdm3d        | Jmjd3, RP23-5O23.5, 1700064E03Rik, BC038313, KIAA0346, mKIAA0346        |
| Mouse      | Jmjd4         | RP23-210M6.10, 6430559I23, AU020939                                     |
| Mouse      | Mina53        | Mina, 1810047J07Rik, 2410057H13Rik, 3830408E23Rik, AI449204             |
| Mouse      | Phf2          |                                                                         |
| Mouse      | Phf8          | 9830141C09Rik, mKIAA1111                                                |
| Mouse      | Pla2g4b       | HsT16992, cPLA2-beta                                                    |
| Mouse      | Ptdsr         | 5730436I23Rik, D11Erttd195e, PSR, PtdSerR, mKIAA0585                    |
| Mouse      | Utx           | RP13-886N14.3, DKFzP686A03225, bA386N14.2                               |
| Mouse      | Uty           | UTY1                                                                    |
