# Supplementary material for: JmjC-domain-containing proteins and histone demethylation
Source: Springer Nature journal article supplement (doi:10.1038/nrg1945), 2006-08-18
Supplement: 41576_2006_BFnrg1945_MOESM2_ESM.pdf [file 41576_2006_BFnrg1945_MOESM2_ESM.pdf]

Supplementary information S2 | **JmjC domain multiple sequence alignment using proteins that contain only a JmjC domain.** Multiple sequence alignment of the JmjC (Jumonji C) domain of proteins found within the JmjC-domain-only group. Fe(II)-binding (red),  $\alpha$ KG-binding (blue), and conserved residues (black and grey) are shaded in each orthologue to show similarities and differences between related proteins within each group.

|    |                 |                                                    |        |         |      |        |        |      |         |                 |
|----|-----------------|----------------------------------------------------|--------|---------|------|--------|--------|------|---------|-----------------|
| sp | SPAC25H1:       | -----LYAKDMHLFRHLDPAFPYSTPDI FADDWLNAYVIDCESDDFR-- | FAYLGS | SHLTTGL | HHTD | VYASHS | FVSNLC | GVK  | WLFID-- | PKDLQT          |
| ce | 1E200 :         | -----HNMCSVQLVNPQTYYDRWYLCEVIQEQFGCFVGANTY----     | LTPAG  | SSGF    | FPHW | DEID-- | AFLLQ  | VEGR | KYWR    | WNA----         |
| dm | CG2982 :        | -----NPSYILRLRQVCTVLQEFHCKVGANLY----               | LTPPN  | SQGF    | FAPH | YDIE-- | AFVIQ  | VEGR | KRWL    | LYE----         |
| hs | NO66 :          | -----FSTTVWQFLAVLQEQFGSMAGSNVY----                 | LTPPN  | SQGF    | FAPH | YDIE-- | AFVLQ  | LEGR | KRLW    | RVYR----        |
| mm | NO66 :          | -----FSPTVWQFLAVLQEQFGSMAGSNVY----                 | LTPPD  | SQGF    | FAPH | YDIE-- | AFVLQ  | LEGR | KRLW    | RVYR----        |
| hs | MINA53 :        | -----FDQKRATIQFHQPQRKDELWRIQEKLECYFGSLVGSNVY----   | ITPAG  | SQGL    | PPHY | DDVE-- | VFILQ  | LEGE | CKHW    | RLYH----        |
| mm | Mina53 :        | -----DFDQKRATIQFHQPQRKDELWRIQEKLECYFGSLVGSNVY----  | ITPAG  | SQGL    | PPHY | DDVE-- | VFILQ  | LEGE | CKHW    | RLYH----        |
| ce | 5L609 :         | -----LYLAQHRLFDQVPHLKRVDVII PDVCFGESSN--           | PENVD  | MM      | WIGP | QDTS   | PLHD   | PR-- | KMFM    | VQVHGKPLFRMVA-- |
| dm | CG13902 :       | -----EYLAQHELFAQI PALKEDISIPDYCTISNEDT--           | PGAVD  | IK--    | AWL  | PAGT   | VS     | PMHY | DPK--   | HNL             |
| hs | JMJD5 :         | -----GYLAQHQLFDQI PELKQDISIPDYCSLDGGE--            | EEBIT  | IN--    | AWF  | GQGT   | IS     | PLHD | DPQ--   | QNF             |
| mm | Jmj5 :          | -----GYLAQHQLFDQI PELKRDISIPDYCCLNGE--             | EEBIT  | IN--    | AWF  | GQGT   | IS     | PLHD | DPQ--   | QNF             |
| dm | CG10133 :       | -----IQKQNSLNSVDLPELAADLRVSDLDFAQQSFN--            | KPPDA  | VN--    | FWL  | GDER   | AVT    | SMKH | DPY--   | ENV             |
| hs | PLA2G4B :       | -----VQKQCSNLPSELPLQLPDL--ESHVPWASEALG--           | KMPDA  | VN--    | FWL  | GAAA   | AVT    | SLHK | DHY--   | ENL             |
| mm | Pla2g4b :       | -----VQKQCSNLPTELPLQLLSDI--ESHVPWASESLG--          | KMPDA  | VN--    | FWL  | GDA    | AVT    | SLHK | DHY--   | ENL             |
| hs | FIH :           | -----LYLQQTLNLDTVGRKIVMDPLGFNWNWINKQ               | GKRG   | WQLT    | SNLL | LIG    | MEGN   | VT   | PAHY    | DEQ--           |
| mm | Fih :           | -----LYLQQTLNLDTVGRKIVMDPLGFNWNWINKQ               | GKRG   | WQLT    | SNLL | LIG    | MEGN   | VT   | PAHY    | DEQ--           |
| dm | CG12879 :       | KRTKSSQLLNMQQFLRKYGVLDGSDTHWAAQYKKA                | DEV    | PLS     | CRS  | SGI    | GF     | SS   | FGFP--  | DIGN            |
| hs | HSPBAP1 :       | -----Y----ADYKYFVSLFEDKTDLF----                    | QDV    | KWS     | D    | FG     | P      | GR   | NQ      | EST--           |
| mm | Hspbap1 :       | -----Y----ADYKYFVTLFEDKTDVF----                    | QEV    | VSD     | D    | FG     | P      | GR   | NQ      | EST--           |
| ce | 3g50 :          | -----GTGVPPFFHFGPG--FAEVIHGSKRWFLYP--              | YEQ    | RPN     |      |        |        |      |         |                 |
| hs | LOC339123 :     | -----PTSLGNDTLVFFGDNNFTEWASLFRHYS                  | PP     | PP      | GL   | T      | P      | A    | P       | A               |
| mm | 2610003J06Rik : | -----LYFFGDNNFTEWASLFRHYSPPFRLLGTT                 | P      | P       | A    | P      | A      | P    | A       | P               |
| dm | CG5383 :        | -----HRRRKLDDYVVPKYFRDDL--QYCGENRR                 | P      | P       | P    | P      | P      | P    | P       | P               |
| ce | 4F419 :         | -----RKTKKLSEDSVVPKFEDDLF--HYADDKR                 | P      | P       | P    | P      | P      | P    | P       | P               |
| hs | PTDSR :         | -----PKRRKLLLEDYKVPKFFTDLF--QYAGE                  | K      | R       | P    | P      | P      | P    | P       | P               |
| mm | Ptdsr :         | -----PKRRKLLLEDYKVPKFFTDLF--QYAGE                  | K      | R       | P    | P      | P      | P    | P       | P               |
| dm | CG7200 :        | -----LYLKDWHLAAQMP--GYNFYKVPKYFASD                 | W      | L       | N    | E      | Q      | I    | Q       | G               |
| hs | JMJD4 :         | -----LYLKDWHLCRDFP--VEDVFTLVPYFSSD                 | W      | L       | N    | E      | W      | D    | L       | D               |
| mm | Jmj4 :          | -----SLVNDL--EDIFTLPVYFSSDWLNEF                    | W      | D       | L    | N      | V      | D    | D       | Y               |
